# Supplementary material for: I Want More and Better Cells! – An Outreach Project about Stem Cells and Its Impact on the General Population
Source: PLOS journal article supplement (doi:10.1371/journal.pone.0133753), 2015-07-29
Supplement: S1 (10.1371/journal.pone.0133753.s001) [file journal.pone.0133753.s001]

**Evaluation scheme designed for the project, based in the Logic Model of Evaluation.**

| <b>Inputs</b>                                            | <b>Activities</b>                                                         | <b>Outputs</b>                                                         | <b>Outcomes</b>            | <b>Strategic impact</b>                                                                 |
|----------------------------------------------------------|---------------------------------------------------------------------------|------------------------------------------------------------------------|----------------------------|-----------------------------------------------------------------------------------------|
| Funding                                                  | Production of outreach materials about stem cells                         | Dissemination of the outreach materials                                | Knowledge                  | Improvement of scientific literacy of the Portuguese population in the stem cells field |
| Researchers with great expertise in the stem cells field | and their applications:<br>Comic book<br>Newspaper illustrated chronicles | throughout the Portuguese population                                   | Understanding              |                                                                                         |
| Science communication strategies                         | Podcasts<br>Animated videos                                               | Quantitative evaluation to a sample from Portuguese population (n=206) | Engagement<br><br>Attitude |                                                                                         |
